# Supplementary material
Source: publisher site journal article supplement (https://www.dovepress.com/get_supplementary_file.php?f=197783.xlsx)
Supplement: Supplementary file 1 [file get_supplementary_file.php]

## Sheet: Sheet1
	age	Date of Exam	RE SPH	RE CYL POWER	RE CYL AXE	Sph Equ R	LE SPH	LE CYL POWER	LE CYL AXE	Sph Equ L		Deviation Up	Deviation Primary	Deviation Down	Deviation Up- Deviaton Down	V XP1	VXP 2	Deviation Up - Primar	VXP 3	Deviation Primary - Deviation DownGaze	V XP 4	NPC Break	NPC Recovery	Phoria Distance (+ EXO - ESO)	Dist BO Vergence Blur	Dist BO Vergence Break	Dist BO Vergence Recovery	Near Phoria	Near BO Vergence Break	Near BO Vergence Blur	Near BO Vergence Recovery	PD	amount of BU yoked prism to satisfy Sheard's criterion at distance	CITT Questionnaire Score	Other	Notes	Location	Gender
1	14	28.1.16	1	0.25	134	0.875	1.25	0.5	143	1		2	1	0	2	0	0	1	0	1	0	0	0	0	6	12	10	1.5	7	20	2	58		9			H	F
2	15	16.10.15	-1.75	0.5	115	-2	-1.75	0.5	85	-2		8	9	10	-2	0	0	-1	0	-1	0	3	4	1.5	0	13	9	8.5	0	20	1	56.5		12			R	M
3	15	2.2.16	0.5	1	145	0	0.75	0.5	15	0.5		2	4	3	-1	0	0	-2	0	1	0	0	0	0	4	14	4	3.5	6	16	11	60		15			H	F
4	16	30.10.15	-6.75	1.25	180	-7.375	-7	1	180	-7.5		12	14	8	4	0	0	-2	0	6	1	0	0	5	9	23	0	13	0	32	14	59.5	3	19	w/3 BU yoked, BO D 9/15/1, DLP 3 BI		H	M
5	16	12.2.16	3.25	1	155	2.75	2.75	0.75	10	2.375		0	0	0	0	0	0	0	0	0	0	0	0	0	14	14	8	2	22	30	9.5	61.5		23			R	F
6	17	26.10.15	-8	1	30	-8.5	-5.75	1.25	145	-6.375		22.5	27.5	17	5.5	0	0	-5	1	10.5	1	4	7	3.5	0	10	0	24	0	18	7	69		4			R	M
7	17	9.5.16	-0.25	0.5	30	-0.5	-0.25	0.25	65	-0.375		8	3	0	8	0	0	5	1	3	0	3	5	2	4	8	5	4	0	18	8	68		41	takes ritalin, has Mongolid slant right eye, likes BU yoked	has no glasses -- noticed marked improvement w/new Rx	H	M
8	17	1.9.16	-1.75	0.25	30	-1.875	-1.5	0.25	150	-1.625		6	6	0	6	0	0	0	0	6	1	0	0	0	20	28	14	-4	0	38	33	61.5		12			R	M
9	18	10.9.15	-2.25	0.5	130	-2.5	-3	0.5	50	-3.25		17	6	0	17	1	1	11	1	6	1	0	0	2	0	24	12	-3	0	40	n/a	58		14	BI near 0/15/1		R	M
10	18	25.9.15	-2.75	1	175	-3.25	-2.75	1.25	10	-3.375		9	4	0	9	0	0	5	1	4	0	0	0	-1	14	22	12	-2	20	22	16	57		15	BI near 0/24/18ת BI dist 0/8/6		R	M
11	18	31.12.15	-1.5	0.25	95	-1.625	-1.5	0.25	95	-1.625		1	3	2	-1	0	0	-2	0	1	0	0	0	1	0	16	16	2	0	28	24	60		26			R	F
12	19	20.9.15	0.25	0	0	0.25	0.5	0.25	176	0.375		16	14	5	11	0	1	2	0	9	1	0	0	10	6	16	2	13	0	28	7	62	more 'n 6	12	As Ph D 7.5, N 9	wears prism glasses w/both BU and BI, parents have high cyl.s, high near phorias, mom blue irides, dad brown, H/O hemangioma on one bicep, cortical intermittent suppres-sion 1 eye, vertical phoria, born outdoors, VT, PAL's in past	R	F
13	19	14.10.15	-0.25	0.5	95	-0.5	-0.75	0.25	0	-0.875		7	12	4	3	0	0	-5	1	8	1	4	8	2.5	4	16	10	14.5	20	22	14	56	3	26	w/3 BU yoked, BO D 7/16/6, DLP 1.75 BI	H/O VT	R	F
14	19	20.1.16	-4.25	1.25	20	-4.875	-5.75	0.75	160	-6.125		4	8	3	1	0	0	-4	0	5	1	0	0	0	10	18	6	0.5	28	32	22	66		11			R	F
15	19	31.1.16	-4.25	2	5	-5.25	-3.75	1.5	170	-4.5		1	1	-1	2	0	0	0	0	2	0	0	0	0	0	8	2	3	0	16	10	63		14			H	M
16	19	1.2.16	-0.5	0.75	102	-0.875	-0.25	0.5	74	-0.5		6	0.5	0	6	0	0	5.5	1	0.5	0	0	0	0	12	16	9	2.25	12	15	9	62.5		15			H	M
17	19	8.2.16	0.25	0.25	129	0.125	0.5	0.5	82	0.25		2	0	0	2	0	0	2	0	0	0	0	0	-2	0	17	15	0	0	28	13	60		19	likes near Add		H	F
18	19	12.2.16	-2.75	1	65	-3.25	-2.5	0.5	115	-2.75		10	17	0	10	0	1	-7	1	17	1	6	12	9.5	3	40+	n/a	15	14	19	3	53		19		w/4 BU yoked, 9.5 IN, BO D 3/19.5/9	H	F
19	19	2.9.16	-1	1.75	105	-1.875	-6.75	0.5	115	-7		20	14	8	12	0	1	6	1	6	1	0	0	2	0	16	4	4	0	27	20	63.5		10	likes 4 BU @D, 5 BU @ N	D x/15/8, N x/19/11	R	M
20	20	11.9.15	-3.75	1	40	-4.25	-2.75	0.25	140	-2.875		11	9	3	8	0	0	2	0	6	1	5	7	0	20	45	n/a	3.5	0	38	24	67		40	likes 9+ BU @ N	wears CL's	R	F
21	21	31.12.15	0	0.75	120	-0.375	0	0.5	70	-0.25		3	4	0	3	0	0	-1	0	4	0	0	0	1.5	15	20	-2	2	24	26	12	58		22			R	F
22	21	2.2.16	0	0.25	175	-0.125	0.25	0.25	125	0.125		1	4	0	1	0	0	-3	0	4	0	0	0	2	18	20	18	2	24	26	14	60		15			H	F
23	21	16.2.16	-3.5	0.25	160	-3.625	-2.25	0.25	20	-2.375		3	0	0	3	0	0	3	0	0	0	4	6	0	20	23	11	0	0	26	14	66		13			H	F
24	21	18.2.16	2	0.75	10	1.625	1.5	1.25	8	0.875		8	6	-2	10	0	1	2	0	8	1	5	6	1	6	9	8	0	6	8	7	62.5		6		Add +0.75, intermittente suppression during Binocular Balance test	R	M
25	21	21.2.16	-2.5	1	98	-3	-3.25	0.75	12	-3.625		6	9	0	6	0	0	-3	0	9	1	4	5	0	6	10	10	9.25	20	24	0.5	64		15			H	M
26	21	21.2.16	-6.25	0.75	10	-6.625	-5.5	0.75	175	-5.875		10	10	-1	11	0	1	0	0	11	1	6	8	0	5	25	17	0	0	31	30	60		15			H	F
27	22	4.2.16	-11	0.25	55	-11.125	-11.5	0.75	180	-11.875		8	8	2	6	0	0	0	0	6	1	3	5	3	0	25	12	10	58	30	20	63.5		8			H	M
28	22	5.2.16	-1.75	1	175	-2.25	-2.75	0.75	180	-3.125		10	8	6	4	0	0	2	0	2	0	0	0	1.5	0	12	4	4.5	0	22	11	60		13			R	F
29	22	21.2.16	-0.5	0.25	170	-0.625	-1	0.5	16	-1.25		7	8	0	7	0	0	-1	0	8	1	0	0	2	18	22	11	6	14	23	12	59		12			H	F
30	22	31.8.16	-2.25	1.25	102	-2.875	-2.75	0.75	77	-3.125		12	7	6	6	0	0	5	1	1	0	0	0	3	16	28	28	5	32	40+	n/a	61.5		21	RE lower		R	F
31	22	26.9.16	-2.75	1.5	175	-3.5	-1.75	1.75	15	-2.625		8	6	2	6	0	0	2	0	4	0	0	0	0	19	22	8	0	0	22	15	61		22			R	M
32	23	4.2.16	0.25	1.75	105	-0.625	0	0.75	75	-0.375		4	2	0	4	0	0	2	0	2	0	0	0	-4	24	32	7	-5.5	0	20	20	64		16			H	M
33	23	21.2.16	-3	1	175	-3.5	-2	0.75	50	-2.375		2	4	3	-1	0	0	-2	0	1	0	0	0	4	0	17	16	9	0	10	8	62		4	likes 4 BI @ d, 10 BI @ N, over old gl.s		H	F
34	23	2.3.16	2.5	1.25	100	1.875	2.5	0.75	95	2.125		-2	-2	0	-2	0	0	0	0	-2	0	0	0	4	5	10	5	9	0	5	3	56		33	mild amblyopia LE, h/o VT	h/o forehead trauma twice	R	F
35	24	15.10.15	-5.25	0.25	0	-5.375	-4.25	0.75	160	-4.625		8	8	1	7	0	0	0	0	7	1	0	0	-1	16	22	8	4.5	8	10	8	53		14	BO D 5/10/4		R	F
36	24	27.12.15	-8.5	1	30	-9	-7.75	1	170	-8.25		10	5	0	10	0	1	5	1	5	1	0	0	0.75	16	18	8	17.5	0	22	16	59		3	recent HA's & tired (borderln mononucleosis?)	wears CL's, likes 5 BU over gl.s	R	F
37	24	31.1.16	-5	0.5	85	-5.25	-5	0.5	110	-5.25		-3	4	2	-5	0	0	-7	1	2	0	0	0	-10	28	40+	n/a	-2.5	0	40+	n/a	58.5		16	FCC +1, likes 4 BO over old gl.s		H	F
38	24	5.2.16	-3	0.5	120	-3.25	-2.75	0.75	15	-3.125		10	8	6	4	0	0	2	0	2	0	0	0	2	6	18	12	4.5	18	32	20	63		11			R	M
39	24	7.2.16	-7.75	2.25	165	-8.875	-7.75	3	15	-9.25		6	7	0	6	0	0	-1	0	7	1	0	0	1.5	10	22	12	3.5	0	40+	n/a	62		16			R	F
40	25	13.10.15	-2.75	0.5	5	-3	-2.25	1	85	-2.75		3	5	-1	4	0	0	-2	0	6	1	0	0	3.5	10	30	n/a	2	0	22	14	61		10	worked on her head tilt, did VT. 4th yr optom student		H	F
41	25	15.10.15	0	4.5	5	-2.25	2	5	175	-0.5		18	15	13	5	0	0	3	0	2	0	0	0	3.5	12	28	16	11	24	30	24	66		8	normal k topos		R	M
42	25	9.11.15	-1.25	0.25	180	-1.375	-0.25	0.5	115	-0.5		10	12	14	-4	0	0	-2	0	-2	0	0	0	6	0	11	4	1	0	10	8	58.5	6	10	w/6 BU, 3XP DVP, BO 0/9/2, sister of #1, both had unusual births	w/3 BU, 6 BI w/0/10.5/-3; w/5 BU, 4.5 XP w/0/6.5/-2.5. Rejects 2 to 4 BI at D	R	F
43	25	28.12.15	-0.75	-0.75	125	-0.375	-0.75	0.75	75	-1.125		2	0	0	2	0	0	2	0	0	0	0	0	-2	16	26	22	-5.5	11	14.5	12	55		25	likes Add +1.25, rejex 4 BO		H	F
44	25	2.2.16	-1.25	0.25	90	-1.375	-2.25	0.75	5	-2.625		3	2	5	-2	0	0	1	0	-3	0	0	0	0	18	24	17	0	0	30	19	57		13			H	F
45	25	11.2.16	1.25	0.75	140	0.875	1	0.25	18	0.875		-2	-1	2	-4	0	0	-1	0	-3	0	0	0	-1	16	24	14	-3	16	28	16	59		22			H	F
46	26	19.10.15	-0.5	0.5	15	-0.75	-0.5	0.25	175	-0.625		5	2	0	5	0	0	3	0	2	0	0	0	0	0	20	14	-1.5	0	34	18	61		14			H	F
47	26	2.2.16	-2	0.25	110	-2.125	-2.25	0.5	65	-2.5		6	5	3	3	0	0	1	0	2	0	0	0	1	16	36+	n/a	-5	24	28	24	63		2	rejects Add		H	F
48	26	3.2.16	-4.25	0.25	145	-4.375	-3.75	0.25	60	-3.875		1	1	0	1	0	0	0	0	1	0	4	6	-4	12	24	24	-3	18	32	22	63		3	likes 1 out		R	F
49	27	13.8.15	-4.5	0.75	137	-4.875	-6	0.5	15	-6.25		12	12	6	6	0	0	0	0	6	1	0	0	4.5	0	22	3	6	0	30	0	63		6			R	M
50	27	25.11.15	-5.5	1.5	95	-6.25	-5.25	0.75	85	-5.625		10	7	3	7	0	0	3	0	4	0	0	0	0	14	24	8	-2	18	38	10	59		14			R	F
51	27	28.1.16	-3.5	0.5	155	-3.75	-2	1.25	178	-2.625		14	10	0	14	0	1	4	0	10	1	0	0	4.5	12	17	-2	8.5	14	29	12	62		22			H	F
52	27	31.1.16	-3.5	0.75	145	-3.875	-3.25	0.75	30	-3.625		4	6	0	4	0	0	-2	0	6	1	0	0	-1	0	14	7	3	0	14	12	65		9			H	M
53	27	2.2.16	-4.75	0.75	105	-5.125	-5	0.75	90	-5.375		5	5	2	3	0	0	0	0	3	0	0	0	0	16	31	11	4	0	28	17	61		19			H	M
54	29	31.1.16	-7	1.25	180	-7.625	-4.75	-2	180	-3.75		0	0	0	0	0	0	0	0	0	0	0	0	0	30	34	4	3.5	0	38	14	58		11			H	F
55	29	9.2.16	1	0.25	65	0.875	0.25	1.5	70	-0.5		4	2.5	5	-1	0	0	1.5	0	-2.5	0	4	6	-1.25	8	10	10	4.25	0	24	17	62		19			H	F
56	29	18.2.16	-2.5	0.75	25	-2.875	-2.5	1	175	-3		1	7	4	-3	0	0	-6	1	3	0	0	0	-2	18	26	6	0	26	28	11	68		14			R	F
57	30	21.12.15	-2.25	0.25	55	-2.375	-3	0.25	50	-3.125		9	10	5	4	0	0	-1	0	5	1	0	0	3	0	10	1	6	0	8	-2	63		10			R	M
58	30	1.2.16	-2.5	1.75	110	-3.375	-2.25	2	80	-3.25		4	4	2	2	0	0	0	0	2	0	4	6	0	0	20	14	1.5	0	20	17	63		17			R	M
59	30	3.2.16	-0.5	0.25	97	-0.625	-0.25	0.25	55	-0.375		6	4	-0.5	6.5	0	0	2	0	4.5	1	8	10	3	10	14	6	13	6	11	10	62.5		0	CI	likes 2 to 4 BI @ D	R	M
60	30	8.2.16	-2.5	0.5	172	-2.75	-1.75	1	172	-2.25		6	2	0	6	0	0	4	0	2	0	0	0	1.25	10	28	14	3.5	0	32	18	63		22	net overrefraction w/SCL's in performed		H	F
61	31	14.2.16	-0.5	1.25	105	-1.125	-1	0.5	75	-1.25		12	8	6	6	0	0	4	0	2	0	0	0	2.25	6	15	11	9	12	20	14	58		22			R	M
62	31	18.2.16	-8.75	0.25	27	-8.875	-9.25	0.5	170	-9.5		2	2	0	2	0	0	0	0	2	0	3	4	-4	0	20	14	-3	18	40+	n/a	59.5		7			R	M
63	32	08.11.15	-5	0.75	40	-5.375	-5	1	140	-5.5		5	0	-2	7	0	0	5	1	2	0	0	0	6	26	36	n/a	-3.5	24	30	10	61		0			R	M
64	33	2.2.16	-0.25	0.75	125	-0.625	-0.25	0.75	55	-0.625		1	0	0	1	0	0	1	0	0	0	0	0	-4.5	8	10	9	-4.5	0	23	24	59		13	likes 2 out and Add +1		R	M
65	34	22.10.15	-5	2.5	5	-6.25	-6	1.25	170	-6.625		17	14	9	8	0	0	3	0	5	1	5	7	1.25	0	9	2	12	0	10	-4	61		6			R	M
66	35	17.8.15	-5	1.75	90	-5.875	-5.25	1.5	95	-6		15	14	0	15	1	1	1	0	14	1	0	0	10.5	0	28	8	-4	0	39	8	59.5		1	DE, BI near 15/14/0	wears prism glasses BU, vertical phoria,	R	F
67	35	27.1.16	-2.25	1	15	-2.75	-1.5	0.75	170	-1.875		1	1	1	0	0	0	0	0	0	0	0	0	-4	0	18	16	-8	0	20	18	55		21	likes 3 BO		H	F
68	35	14.2.16	-6	1.25	15	-6.625	-6	2.5	165	-7.25		6	7	9	-3	0	0	-1	0	-2	0	3	5	-1	6	12	-2	4	0	12	12	58		11			R	F
69	35	15.2.16	1	0.75	160	0.625	0.5	0.75	170	0.125		0	0	0	0	0	0	0	0	0	0	0	0	0	9	24	7.5	6.25	4	22	12	61		22	likes Add +0.25	recent HBP, recent VA 6/12 vs .prev 6/6	R	F
70	36	23.10.15	-5.5	0.75	103	-5.875	-4	0.25	45	-4.125		4	5	0	4	0	0	-1	0	5	1	6	7	2	6	10	-3	10	12	16	1	65		10	facial asym		H	F
71	36	11.2.16	-3.5	1	77	-4	-3.25	1.5	80	-4		8	9	4	4	0	0	-1	0	5	1	0	0	1	0	21	20	6.5	0	38	26	62		7			R	F
72	37	02.12.15	-4	2.5	8	-5.25	-5	1	3	-5.5		8	8	6	2	0	0	0	0	2	0	0	0	0	0	19	11	0	0	32	19	62.5		0	likes 3 BU @ D		R	M
73	37	4.2.16	1.5	1.75	10	0.625	0.5	2.75	175	-0.875		6	4	4.5	1.5	0	0	2	0	-0.5	0	10	14	1.5	0	5	0	11	0	5.5	-6	62		12	Add +1, likes 1 IN @ N		H	M
74	38	31.12.15	-4.25	0.75	110	-4.625	-4	0.75	100	-4.375		2	2	4	-2	0	0	0	0	-2	0	0	0	0	0	10	8	3	34	38	24	64		3			H	F
75	39	10.3.16	-10	1	110	-10.5	-10	0.5	90	-10.25		3	3	0	3	0	0	0	0	3	0	38	39	-3	0	18	8	3	0	19	0	60		19	patient was tired		H	M
	24.96					-3.13167				-3.08667		6.48667	5.95333	2.54667	How many VXP	2	9		13		28			0.99				3.64				61.0067		14.0667			34	31
	6.39349					3.01088				2.94996		5.31506	5.09449	3.77239										3.16079				5.97464				3.27923		8.21556			41	44
1	42	08.11.15	-4	0.5	90	-4.25	-2.5	0.75	30	-2.875		7	3	4	3	0	0	4	0	-1	0	0	0	0	12	40	n/a	0	22	40	n/a	60		22			R	M
2	42	2.2.16	-7.25	1.5	110	-8	-6.5	2	70	-7.5		1	1	1	0	0	0	0	0	0	0	0	0	2	10	40+	n/a	3	12.5	40+	n/a	57		20			H	F
3	43	11.2.16	-2.5	0.75	157	-2.875	-2.5	2.5	180	-3.75		4	2	0	4	0	0	2	0	2	0	4	6	1.5	8	14	6	8	12	18	13	58		12			H	F
4	44	6.11.15	-3.5	0.25	45	-3.625	-4	0.5	15	-4.25		4	4	4	0	0	0	0	0	0	0	3	4	1.5	0	16	6	5	0	28	12	60		29			H	F
5	45	30.10.15	-7.75	0.75	175	-8.125	-6.75	1	158	-7.25		16	17	8	8	0	0	-1	0	9	1	0	0	4	19	30	n/a	9	26	36	n/a	64		23			H	M
6	46	22.11.15	-5.75	2	5	-6.75	-6	1.75	5	-6.875		9	10	7	2	0	0	-1	0	3	0	0	0	0	18	40	n/a	6	0	21	2	59		9			R	F
7	46	1.2.16	0	1.25	115	-0.625	-0.25	1.5	60	-1		-3	0	0	-3	0	0	-3	0	0	0	0	0	0	0	25	8	4.5	0	18	12	61		36	doesn't have glasses		R	M
8	46	8.2.16	0	0.5	120	-0.25	0.25	0.75	65	-0.125		4	3	0	4	0	0	1	0	3	0	0	0	1.5	24	34	30	4.5	0	40+	n/a	62		10			H	F
9	47	22.11.15	-7.5	0.25	65	-7.625	-6	1.25	155	-6.625		9	9.5	10	-1	0	0	-0.5	0	-0.5	0	0	0	5.5	17	25	12	4.5	0	24	12	61		0			R	M
10	48	8.2.16	-6.25	4.75	98	-8.625	-6	3.25	60	-7.625		15	9	6.5	8.5	0	0	6	1	2.5	0	0	0	0	24	26	24	11.5	0	12	10	62		35			H	M
11	48	30.9.16	-5.75	0.75	55	-6.125	-5	0.5	75	-5.25		9	9	0	9	0	0	0	0	9	1	0	0	0	0	38+	n/a	4	0	40+	n/a	65		22	maybe accepts 6 BU @ D, possibly accepts 4 BU @ N		R	M
12	49	16.2.16	-5.25	0.5	75	-5.5	-6.25	0.25	15	-6.375		12	12	0	12	0	1	0	0	12	1	4	6	3	0	28	4	15	0	29	10	63		4			H	F
13	49	21.9.16	-3.25	0.5	40	-3.5	-2.5	0.75	115	-2.875		16	8	0	16	1	1	8	1	8	1	0	0	1	0	36+	n/a	16	0	28	3	68.5		19	rejects BU @ D	lifts chin on occasion w/old gl.s	R	M
14	50	15.10.15	1.75	1.25	90	1.125	0.75	0	0	0.75		12	8	5	7	0	0	4	0	3	0	0	0	1	4	24	12	7.5	18	30	10	70		18	Add +2.00?		H	M
15	50	20.1.16	-9	2.25	180	-10.125	-10	1.25	175	-10.625		0	4	0	0	0	0	-4	0	4	0	0	0	-15	13	36+	n/a	-12.5	0	40+	0	59		3	likes 8 to 12 BO @ D		R	F
16	50	27.1.16	-6.25	0.75	116	-6.625	-5.25	0		-5.25		17	14	10	7	0	0	3	0	4	0	0	0	1	2	4	2	14	0	8	6	67		14			H	M
17	50	4.9.16	-1.25	1	90	-1.75	-1	0.5	100	-1.25		20	10	8	12	0	1	10	1	2	0	0	0	2.75	19	38+	n/a	13	32	38+	n/a	63		6	likes 4 BU over old Rx		R	M
18	52	4.11.15	-3	1.25	105	-3.625	-3.75	0.75	70	-4.125		8	6	4	4	0	0	2	0	2	0	0	0	-1	22	26	10	4	22	24	10	65		13			R	M
19	52	18.2.16	0.5	0.75	8	0.125	0.25	1	165	-0.25		4	6	6	-2	0	0	-2	0	0	0	0	0	2.5	0	18	0	11	0	19	0	61		25			H	F
20	53	3.2.16	-0.25	0.75	120	-0.625	-0.25	1	85	-0.75		7	10	8	-1	0	0	-3	0	2	0	10	15	0	0	23	10	16	0	18	4	60		32	H/O prisms, VT		H	F
21	53	11.2.16	-4	1.25	170	-4.625	-4	1.5	5	-4.75		8	4	7	1	0	0	4	0	-3	0	0	0	0	0	22	7	9.5	0	18	6	60		0			H	F
22	54	24.12.15	4.5	1.25	178	3.875	5.5	2	2	4.5		8	19	12	-4	0	0	-11	1	7	1	0	0	10	0	18	2	17	0	25	4	62	needs more than 6	8		DLP w/3 up: 10 In, BO x/9/0; w/6 BU 10.25 In, BO x/8.5/0.5	R	F
23	54	11.2.16	-3.5	0.75	105	-3.875	-3.5	0.5	105	-3.75		4	3	1.5	2.5	0	0	1	0	1.5	0	0	0	-3	0	36+	14	7	0	34	5	68		15	likes 2 out		R	M
24	54	23.2.16	1	0.75	80	0.625	0.75	0.25	70	0.625		3	5	5	-2	0	0	-2	0	0	0	0	0	-5	29	40+	n/a	4.25	35	40+	n/a	58		16			H	F
	48.625					-3.80729				-3.63542		8.08333	7.35417	4.45833		1	3		4		5			0.552083				7.57292				62.2292		16.2917		H	13	12
	3.8086					3.58893				3.46585		5.8154	4.88671	3.82474										4.3514				6.41139				3.51388		10.4652		R	11	12
1	55	1.11.15	-0.25	0.25	140	-0.375	-0.75	0.5	36	-1		8	2	0	8	0	0	6	1			0	0	-2	16	22	6	8.5	12	22	-6	63		27			R	F
2	55	19.2.16	2.75	1.75	60	1.875	0.25	2	120	-0.75		12	8	0	12	0	0	4	0			37	40	0.5	0	6	6	6	0	1	1	70		6	no subj improvement w/4 BU yoked @ D; likes 2 BI @ N		R	M
3	55	15.9.16	-1.5	2.25	80	-2.625	-0.25	2.75	100	-1.625		13	0	0	13	0	0	13	1			0	0	-4	0	19	7	0.5	0	28	6	61.5		20	accepts 8 BU D & N		R	F
4	56	21.10.15	0.5	0.5	135	0.25	0.5	1	80	0		12	10	5	7	0	0	2	0			0	0	0	0	14	0	9	0	13	-2	67		4		Add +2.00?	H	M
5	56	22.11.15	-10.75	0.25	90	-10.875	-8.25	0.5	90	-8.5		10	8	9	1	0	0	2	0			0	0	2	0	35	n/a	5	0	40	n/a	59.5		22	likes 6 BU @ D		R	M
6	56	4.2.16	-7.25	1	65	-7.75	-8.25	0.5	102	-8.5		2	7	5	-3	0	0	-5	1			0	0	1	0	4	1	5	0	24	8	62		3			H	F
7	57	7.2.16	-1.5	2	95	-2.5	-1	-3.25	75	0.625		6	6	2	4	0	0	0	0			0	0	-1.5	3	22	6	6	8	16	4	61		6			H	F
8	57.5	12.2.16	-2	1.5	100	-2.75	-1.25	2.25	85	-2.375		7	7	6	1	0	0	0	0			6	7	0	0	18	9	9	9	16	12	60		20	H/O VT		H	F
9	58	10.2.16	4.25	1.25	70	3.625	5.5	2	16	4.5		-6	-6	-10	4	0	0	0	0			3	5	5.5	0	6	2	7.5	0	5	1	63		18			H	M
10	59	19.11.15	-10	0.75	30	-10.375	-10	0.5	20	-10.25		7	5	7	0	0	0	2	0			0	0	0	16	19	6	9	0	34	0	60		16			H	F
11	59	7.2.16	-2.25	0.25	107	-2.375	-2	0.25	15	-2.125		0.5	0	0	0.5	0	0	0.5	0			3	5	-1.5	0	4	4	0	0	8	7	59		5			H	F
12	59	16.2.16	-3	1	155	-3.5	-2.25	2.25	65	-3.375		-2	0	0	-2	0	0	-2	0			0	0	0	0	10	10	3	0	9	7	53.5		19	chronic fatigue syndr., fibromyalgia		R	F
13	60	4.11.15	-2.5	1	85	-3	-3.5	1.75	110	-4.375		8	8	6	2	0	0	0	0			0	0	0	0	10	5	13.5	0	12	-4	60		18			R	F
14	61	1.11.15	-1.25	0.75	160	-1.625	-3.5	0.75	120	-3.875		16	11	17	-1	0	0	5	1			0	0	0.5	30	40	n/a	6.5	28	40	n/a	70		15			R	M
15	62	23.11.15	-2	2	95	-3	-2	1.25	75	-2.625		13	10	12	1	0	0	3	0			0	0	1	0	14	6	12	4	30	n/a	64		17	likes 3 BU @ D & N		R	M
16	63	12.9.16	-2.25	1.25	100	-2.875	-2	1.75	100	-2.875		4	4	0	4	0	0	0	0			0	0	-0.5	0	27	10	2	0	27	25	58		7	ADD +2.75		H	F
17	65	12.9.16	-5.25	0.75	80	-5.625	-4.75	0.75	90	-5.125		8	8	0	8	0	0	0	0			0	0	0	0	34	18	2	0	37	8	65.5		6			R	M
18	66	11.2.16	-4	1.25	5	-4.625	-4.25	0.5	170	-4.5		2	5	4	-2	0	0	-3	0			0	0	-9	0	6	6	7.5	0	17	6	57		2	likes 2.5 out @ D		H	F
19	67	18.2.16	-1	0.5	60	-1.25	-1.25	0.25	105	-1.375		4	2	0	4	0	0	2	0			0	0	3	0	25	0	8.5	0	34	6	70		29			H	M
20	68	11.9.16	-9.75	1	30	-10.25	-11	0.5	155	-11.25		6	10	0	6	0	0	-4	0			0	0	3	16	36+	n/a	-0.5	36	40+	n/a	68		2			R	M
21	72	7.2.16	2.25	0.75	50	1.875	2.25	0.5	120	2		1	-4	2	-1	0	0	5	1			0	0	0	0	12	6	8	14	18	4	63		6			H	F
22	73	3.2.16	1.25	0.5	107	1	2	1.25	82	1.375		10	8	7	3	0	0	2	0			10	20	1	0	12	6	15	0	12	6	69		13			H	M
23	75	26.6.16	1.25	2	85	0.25	-0.5	1.25	95	-1.125		8	0	0	8	0	0	8	1			0	0	3	0	20	20	4	0	14	7	67.5		1			H	F
	61.5					-2.8913				-2.91848		6.5	4.73913	3.13043		0	0		6					0.0869565				6.3913				63.1087		12.2609		R	10	10
	5.96912					3.85775				3.79638		5.18149	4.58938	5.24449										2.7213				4.02966				4.49627		8.33128		H	13	13
	16.5637	#DIV/0!	3.25824	0.749215	52.9929	3.35261	3.21626	0.884812	56.71	3.2732	#DIV/0!	5.32142	4.93063	4.09122								5.17752	5.99119	3.32174	8.61443	8.64174	6.43549	5.87456	11.202	9.41027	8.03318	8.15407	1.73205	8.65141	#DIV/0!	#DIV/0!	15.0194	15.6498
	30.5	#NUM!	-2.5	0.75	98	-2.9375	-2.375	0.75	85	-2.875	#NUM!	6	5.97667	2								0	0	0.526042	5	19	8	4.5	0	23	10	61.2533	3	14	#NUM!	#NUM!	23.5	21.5
